# Supplementary material for: Doxorubicin and CD-CUR inclusion complex co-loaded in thermosensitive hydrogel PLGA-PEG-PLGA localized administration for osteosarcoma
Source: PubMed Central journal article supplement — Int J Oncol. 2020 May 19;57(2):433–44. doi: 10.3892/ijo.2020.5067 (PMC7307595; doi:10.3892/ijo.2020.5067), 2020-05-19
Supplement: Supplementary_Data.pdf [file Supplementary_Data.pdf]

Figure S1. Molecular structure of PLGA-PEG-PLGA copolymer. a, the CH<sub>2</sub> of PEG; b, the CH<sub>2</sub> of GA; c, the CH of D,L-LA; d, the CH<sub>3</sub> of D,L-LA; e, the CH<sub>2</sub> of PEG near the PLGA.

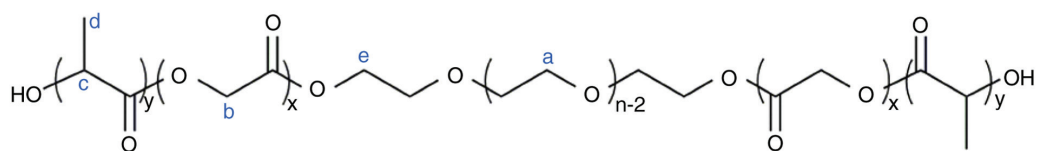

Figure S2. Proton nuclear magnetic resonance spectrum of PLGA-PEG-PLGA copolymer in  $\text{CD}_3\text{Cl}$ . a,  $\text{CH}_2$  of PEG; b,  $\text{CH}_2$  of GA; c,  $\text{CH}$  of D,L-LA; d,  $\text{CH}_3$  of D,L-LA; e,  $\text{CH}_2$  of ester bond.

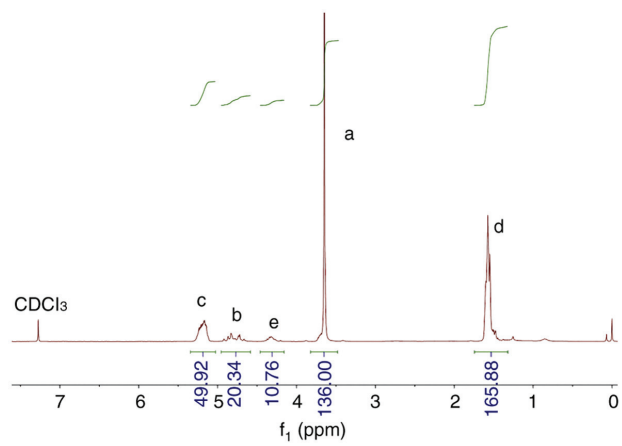

Figure S3. Scanning electron microscopy image of CD-CUR inclusion complex, native CUR and  $\beta$ -CD. CD-CUR,  $\beta$ -cyclodextrin curcumin.

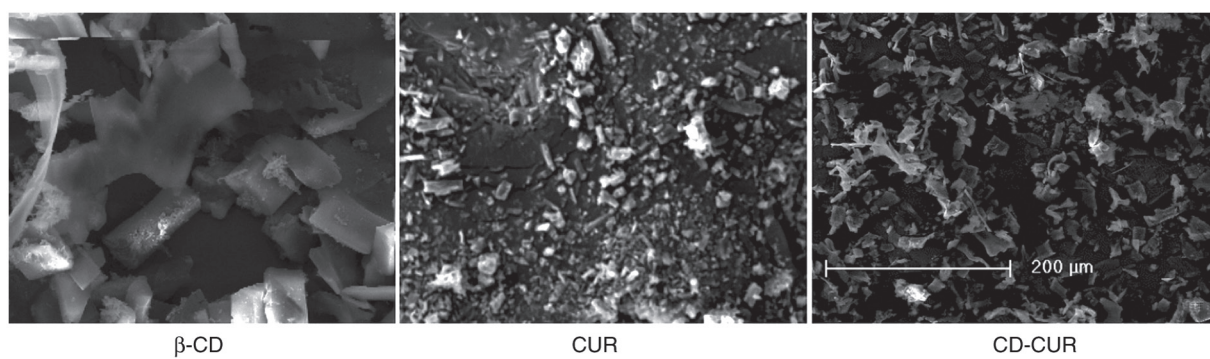

Figure S4. Stability of CD-CUR and native CUR in neutral medium (PBS pH 7.4). CD-CUR,  $\beta$ -cyclodextrin curcumin.

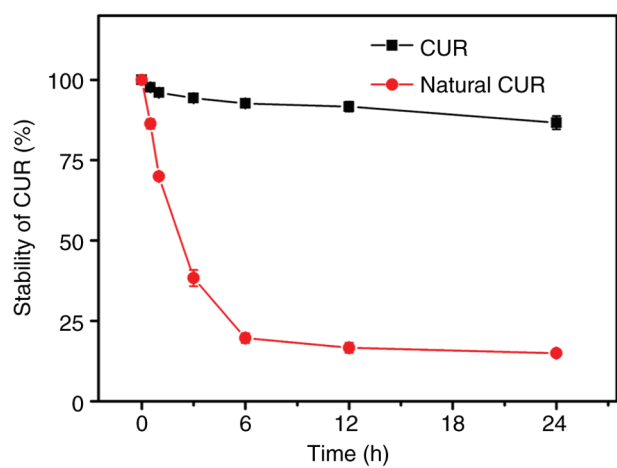

Figure S5. *In vitro* antitumor efficiencies of different strategies in (A) K-7 and (B) Saos-2 cells at 48 h. The CD-CUR inclusion complex was dissolved in PBS, and native CUR was dispersed in PBS and DMSO. The final concentration of DMSO was 0.5% (v/v). \*P<0.05; \*\*P<0.01; n=3. CD-CUR,  $\beta$ -cyclodextrin curcumin.

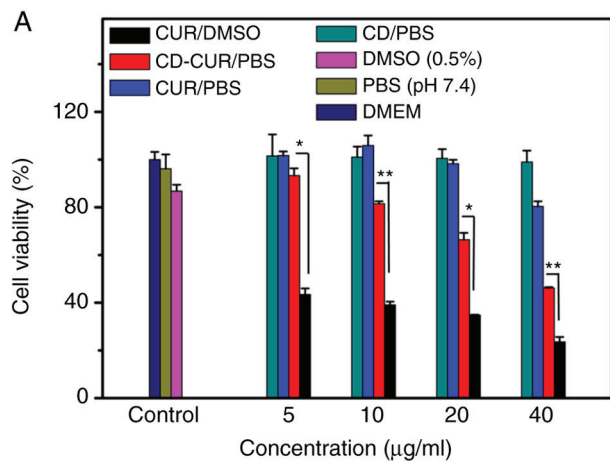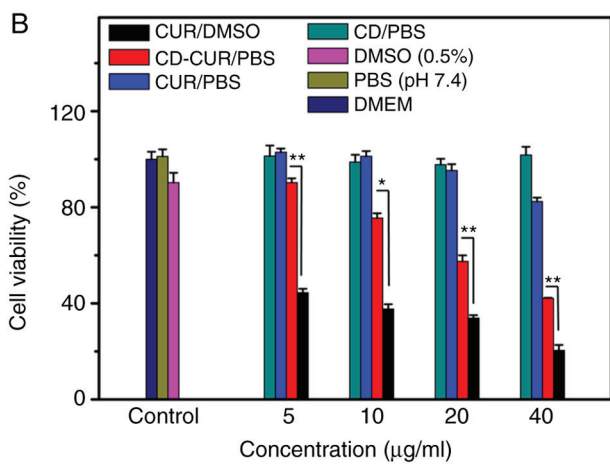

Figure S6. Phase transition diagrams and storage moduli of different drug-loaded hydrogels. (A) Phase transition diagrams of DOX, CD-CUR, or DOX+CD-CUR loaded hydrogels (i.e. Gel+DOX, Gel+CUR, Gel+DOX+CD-CUR). (B) Phase transition diagrams of CD, CUR loaded hydrogels or free Gel (i.e. Gel+CD, Gel+CUR, Gel). (C) Storage moduli of different drug-loaded hydrogels, including Gel, Gel+CD, Gel+CUR, Gel+DOX, Gel+CUR, Gel+DOX+CD-CUR. The concentration of hydrogel selected for rheology analysis was 20% wt. CD-CUR,  $\beta$ -cyclodextrin curcumin; DOX, doxorubicin.

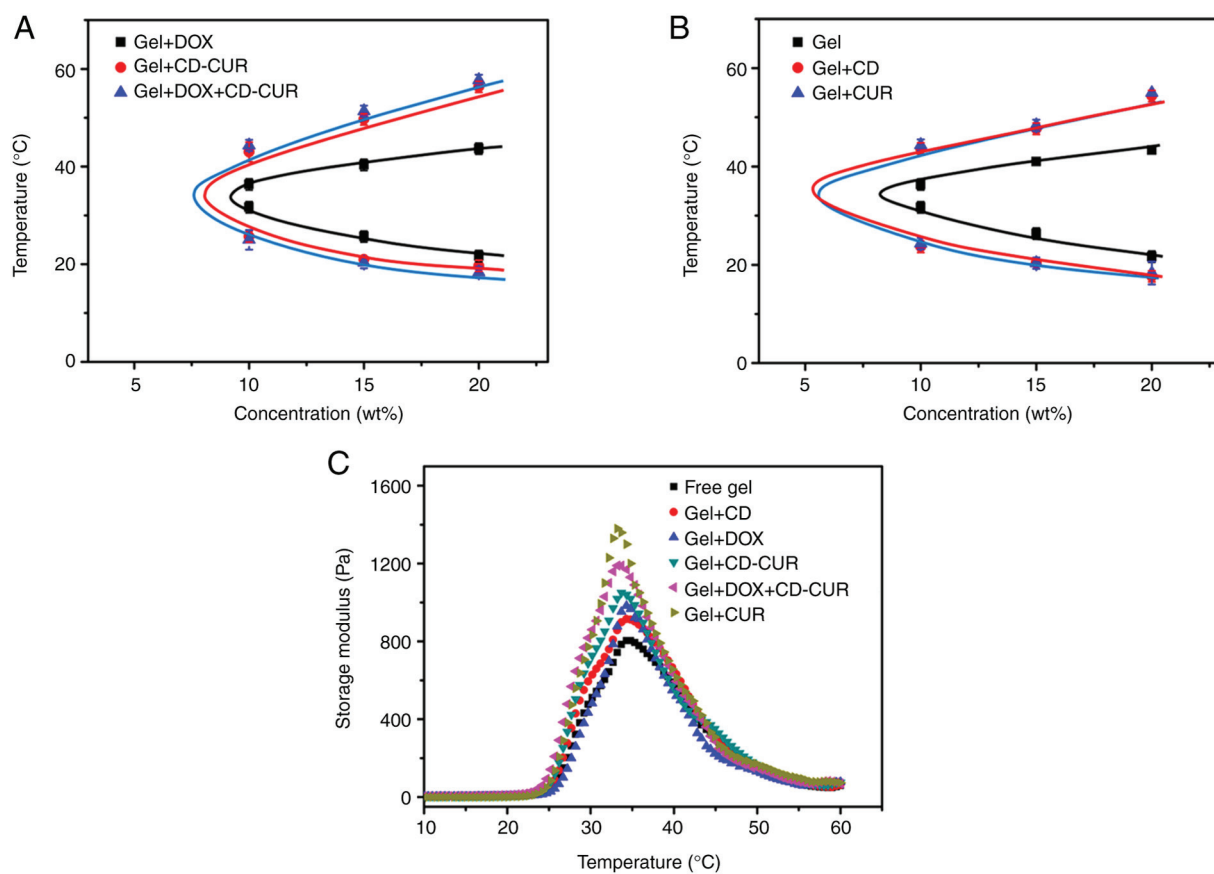

Figure S7. Histological analysis of major organs in different treated groups, including PBS, free gel, CD-CUR loaded gel, free DOX, DOX loaded gel, free DOX+CD-CUR and DOX+CD-CUR co-loaded gel. Magnification, x100. NC, negative control.

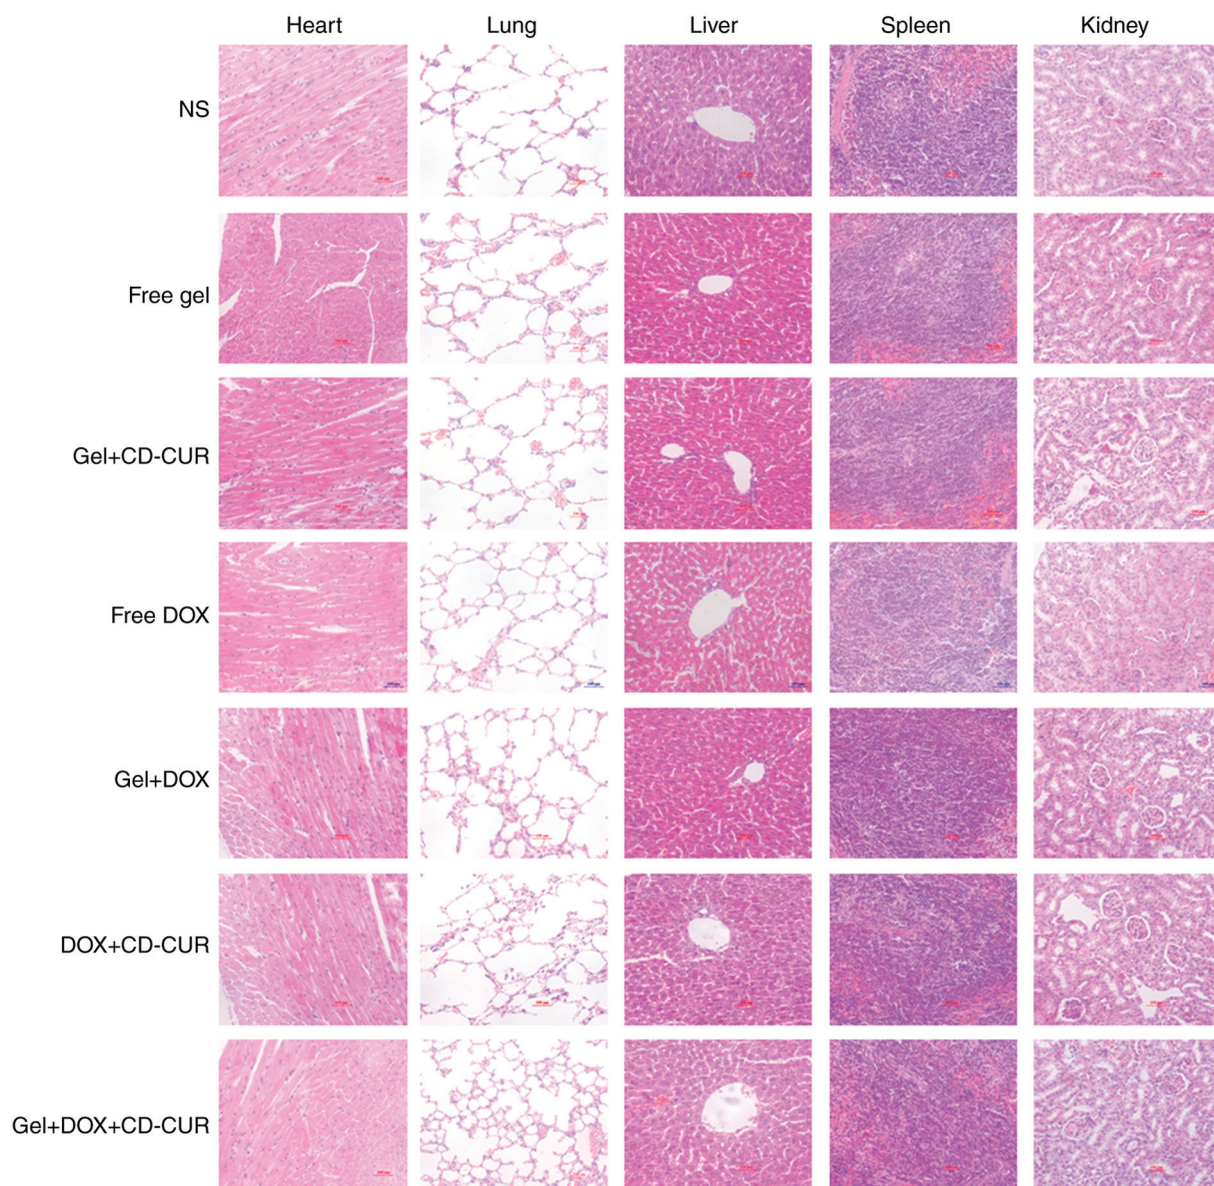

Table SI. IC<sub>50</sub> of different strategies in K-7 and Saos-2 cells.

| Strategies      | IC <sub>50</sub> ( $\mu$ g/ml) in K-7 cells | IC <sub>50</sub> ( $\mu$ g/ml) in saos-2 cells |
|-----------------|---------------------------------------------|------------------------------------------------|
| Free DOX        | 0.35 $\pm$ 0.12                             | 0.39 $\pm$ 0.06                                |
| Gel+DOX         | 0.59 $\pm$ 0.25                             | 0.47 $\pm$ 0.13                                |
| Free DOX+CD-CUR | 0.24 $\pm$ 0.06                             | 0.29 $\pm$ 0.02                                |
| Gel+DOX+CD-CUR  | 0.34 $\pm$ 0.14                             | 0.40 $\pm$ 0.07                                |

Data presented as the mean  $\pm$  SD. The concentration of DOX in all strategies was equal, and the concentration of CUR was equivalent in both combination therapies. CD-CUR,  $\beta$ -cyclodextrin curcumin; DOX, doxorubicin.
